# Supplementary material for: A soluble activator that favors the ex vivo expansion of CD8+CD27+ T cells
Source: JCI journal article supplement (doi:10.1172/jci.insight.141293), 2020-11-18
Supplement: sd1 [file 1]

## Supplemental Figures

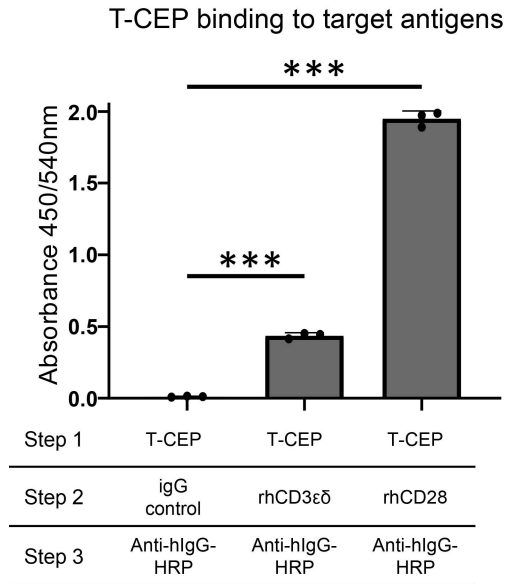

**Supplemental Figure 1:** T-CEP binding to target antigens was demonstrated by enzyme-linked immunosorbent assay (ELISA). A sandwich ELISA was carried out by coating T-CEP on high-binding wells (4µg/mL) and target antigens added to wells. The binding of recombinant human CD3εδ-Fc (4µg/mL), recombinant human CD28-Fc (4µg/mL), and an Fc-matched control (4µg/mL) was detected using an anti-hlgG-HRP conjugate (n=3, one-way ANOVA with Dunnett's test). **Terms:** rhCD3εδ, recombinant human CD3εδ; rhCD28, recombinant human CD28; **Symbols:** \*\*\* P<0.001.

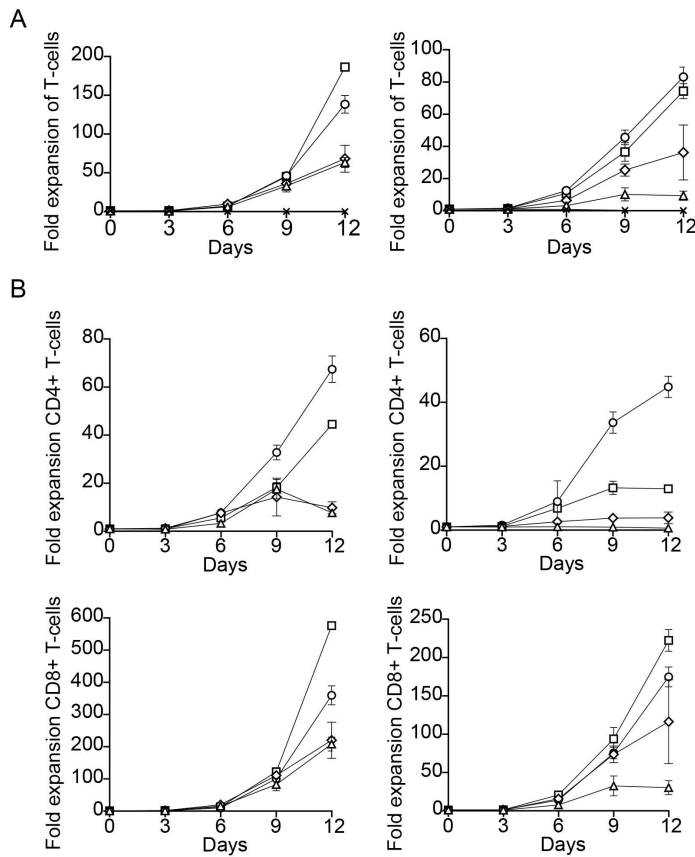

**Supplemental Figure 2:** The individual expansion profiles of PBMC Donors #4 (left) and #5 (right). For each donor, the number of viable cells were counted in duplicate samples using a hemocytometer following the staining of dead cells with trypan blue for each expansion method tested **(A)** 12-Day expansion using specified stimulation and low level of IL-2. **(B)** CD4<sup>+</sup> and CD8<sup>+</sup> T-cell expansions of two donors. The fold expansion was calculated based on the starting number of CD4<sup>+</sup> and CD8<sup>+</sup> T-cells. **Terms:** TACs, Tetrameric antibody complexes; i αCD3, Immobilized anti-CD3; s αCD28, Soluble anti-CD28. **Symbols:** □, T-CEP; ○, TACs; ◇, i αCD3 + s αCD28; △, i αCD3.
